# Supplementary material for: A Randomized, Active-Controlled, 52-Week Study of Hyaluronic Acid Fillers for Anteromedial Malar Region Augmentation
Source: PubMed Central journal article supplement — Plast Reconstr Surg Glob Open. 2020 Feb 26;8(2):e2648. doi: 10.1097/GOX.0000000000002648 (PMC7159933; doi:10.1097/gox.0000000000002648), 2020-02-26
Supplement: gox-8-e2648-s001.pdf [file gox-8-e2648-s001.pdf]

Supplemental Digital Content 1

Table. Analysis of covariance on the change from baseline at week 26 of MFAS score evaluated by the independent blinded raters (full analysis set)

|                                    | YVO <sub>C</sub> (N=80) | RES <sub>S</sub> (N=80) | LS mean difference (95% CI) |
|------------------------------------|-------------------------|-------------------------|-----------------------------|
| Baseline                           | 2.56 (0.05)             | 2.56 (0.05)             | 0.00 (-0.04, 0.04)          |
| Week 26                            | 1.32 (0.07)             | 1.39 (0.07)             | 0.07 (0.01, 0.12)           |
| Change from baseline<br>at week 26 | -1.23 (0.06)            | -1.16 (0.06)            | 0.07 (0.01, 0.12)           |

Note: Data are presented as LS mean (standard error) unless otherwise indicated; data were analyzed using a mixed effects model including treatment and week as repeated measures effects, the subject as random effect, and total injection volume as a covariate; LS mean difference was calculated as RES<sub>S</sub> group – YVO<sub>C</sub> group; total injection volume was not a significant factor in the mean MFAS score (*p*-value= 0.9913) and the mean change in MFAS score (*p*-value= 0.8039).

MFAS, mid-face aesthetic scale; LS mean, least squares mean; CI, confidence interval.
