# Supplementary material for: A Randomized, Active-Controlled, 52-Week Study of Hyaluronic Acid Fillers for Anteromedial Malar Region Augmentation
Source: PubMed Central journal article supplement — Plast Reconstr Surg Glob Open. 2020 Feb 26;8(2):e2648. doi: 10.1097/GOX.0000000000002648 (PMC7159933; doi:10.1097/gox.0000000000002648), 2020-02-26
Supplement: gox-8-e2648-s002.pdf [file gox-8-e2648-s002.pdf]

Supplemental Digital Content 2

Table. Solicited local adverse events by total injection volume after initial injections (safety set)

|                                               | <b>YVO<sub>c</sub></b> | <b>RESs</b>   |
|-----------------------------------------------|------------------------|---------------|
| <b>Subgroup: Low Total Injection Volume</b>   | (N=42)                 | (N=42)        |
| Any solicited adverse events, n (%)           | 41 (97.62)             | 42 (100.00)   |
| Pain, n (%)                                   | 36 (85.71)             | 35 (83.33)    |
| Tenderness, n (%)                             | 38 (90.48)             | 40 (95.24)    |
| Swelling, n (%)                               | 36 (85.71)             | 34 (80.95)    |
| Redness, n (%)                                | 25 (59.52)             | 23 (54.76)    |
| Bruising, n (%)                               | 17 (40.48)             | 16 (38.10)    |
| Itching, n (%)                                | 14 (33.33)             | 15 (35.71)    |
| Papule, n (%)                                 | 16 (38.10)             | 19 (45.24)    |
| Pigmentation, n (%)                           | 14 (33.33)             | 13 (30.95)    |
| Duration, days                                |                        |               |
| Pain, mean (SD)                               | 4.39 (5.37)            | 3.80 (4.91)   |
| Tenderness, mean (SD)                         | 9.61 (12.52)           | 6.03 (5.53)   |
| Swelling, mean (SD)                           | 14.53 (17.67)          | 13.24 (16.94) |
| Redness, mean (SD)                            | 3.92 (4.48)            | 3.70 (4.38)   |
| Bruising, mean (SD)                           | 10.00 (10.75)          | 4.56 (3.76)   |
| Itching, mean (SD)                            | 4.93 (6.58)            | 3.93 (6.26)   |
| Papule, mean (SD)                             | 13.94 (20.72)          | 11.00 (14.10) |
| Pigmentation, mean (SD)                       | 6.36 (8.65)            | 6.54 (8.86)   |
| <b>Subgroup: Large Total Injection Volume</b> | (N=41)                 | (N=41)        |

|                                     | YVO <sub>C</sub> | RES <sub>S</sub> |
|-------------------------------------|------------------|------------------|
| Any solicited adverse events, n (%) | 41 (100.00)      | 41 (100.00)      |
| Pain, n (%)                         | 41 (100.00)      | 39 (95.12)       |
| Tenderness, n (%)                   | 39 (95.12)       | 41 (100.00)      |
| Swelling, n (%)                     | 29 (70.73)       | 34 (82.93)       |
| Redness, n (%)                      | 24 (58.54)       | 29 (70.73)       |
| Bruising, n (%)                     | 13 (31.71)       | 12 (29.27)       |
| Itching, n (%)                      | 13 (31.71)       | 16 (39.02)       |
| Papule, n (%)                       | 15 (36.59)       | 12 (29.27)       |
| Pigmentation, n (%)                 | 16 (39.02)       | 17 (41.46)       |
| Duration, days                      |                  |                  |
| Pain, mean (SD)                     | 3.10 (2.98)      | 3.87 (3.35)      |
| Tenderness, mean (SD)               | 7.56 (6.20)      | 7.66 (5.83)      |
| Swelling, mean (SD)                 | 10.45 (13.88)    | 7.85 (10.37)     |
| Redness, mean (SD)                  | 4.21 (3.59)      | 4.48 (3.26)      |
| Bruising, mean (SD)                 | 7.77 (10.73)     | 6.17 (4.17)      |
| Itching, mean (SD)                  | 4.85 (4.32)      | 5.75 (4.48)      |
| Papule, mean (SD)                   | 6.80 (6.53)      | 7.42 (6.19)      |
| Pigmentation, mean (SD)             | 6.94 (10.90)     | 5.88 (3.98)      |

Note: The subgroups were divided by the median of the total injection volume in each treatment group. Low total injection volume is  $\leq 1.5$  mL in the YVO<sub>C</sub> group and  $\leq 1.4$  mL in the RES<sub>S</sub> group, and large total injection volume is  $> 1.5$  mL in the YVO<sub>C</sub> group and  $> 1.4$  mL in the RES<sub>S</sub> group

SD, standard deviation.
